# Supplementary material
Source: Royal Society of Chemistry journal article supplement (doi:10.1039/d6me00006a)
Supplement: d6me00006a1.pdf [file d6me00006a1.pdf]

## Electronic Supplementary Information

### Hydrothermal in situ bifunctional hydrazine-carboxylate ligands synthesis for creating 3D rare earth metal-organic frameworks

Chatphorn Theppitak,<sup>a</sup> Pacharapon Jearanaiwiwat,<sup>a</sup> Sakchai Laksee,<sup>b</sup> Mongkol Sukwattanasinitt,<sup>c</sup>  
Filip Kielar,<sup>d</sup> Shinya Hayami<sup>e</sup> and Kittipong Chainok<sup>\*a,f</sup>

<sup>a</sup> *Thammasat University Research Unit in Multifunctional Crystalline Materials and Applications (TU-MCMA), Faculty of Science and Technology, Thammasat University, Pathum Thani 12121, Thailand.*

<sup>b</sup> *Thailand Institute of Nuclear Technology (Public Organization), Nakorn Nayok, 26120, Thailand*

<sup>c</sup> *Department of Chemistry, Faculty of Science, Chulalongkorn University, Bangkok 10330, Thailand*

<sup>d</sup> *Department of Chemistry, Faculty of Science, Naresuan University, Phitsanulok 65000, Thailand*

<sup>e</sup> *Department of Chemistry, Graduate School of Science and Technology and Institute of Pulsed Power Science, Ku-mamoto University, 2-39-1 Kurokami, Chuoku, Kumamoto, 860-8555 Japan*

<sup>f</sup> *Center of Excellence on Petrochemical and Materials Technology, Chulalongkorn University, Bangkok 10330, Thailand*

**Table S1** Crystal data and structural refinements for the **REMOFs**

| Identification code                                                               | <b>Nd@NO<sub>3</sub></b>                                         | <b>Sm@NO<sub>3</sub></b>                                         | <b>Eu@NO<sub>3</sub></b>                                         | <b>Gd@NO<sub>3</sub></b>                                         | <b>Tb@NO<sub>3</sub></b>                                         |
|-----------------------------------------------------------------------------------|------------------------------------------------------------------|------------------------------------------------------------------|------------------------------------------------------------------|------------------------------------------------------------------|------------------------------------------------------------------|
| CCDC no.                                                                          | 2504410                                                          | 2504411                                                          | 2504412                                                          | 2504413                                                          | 2504414                                                          |
| Formula                                                                           | C <sub>16</sub> H <sub>14</sub> N <sub>5</sub> O <sub>9</sub> Nd | C <sub>16</sub> H <sub>14</sub> N <sub>5</sub> O <sub>9</sub> Sm | C <sub>16</sub> H <sub>14</sub> N <sub>5</sub> O <sub>9</sub> Eu | C <sub>16</sub> H <sub>14</sub> N <sub>5</sub> O <sub>9</sub> Gd | C <sub>16</sub> H <sub>14</sub> N <sub>5</sub> O <sub>9</sub> Tb |
| Formula weight                                                                    | 564.56                                                           | 570.67                                                           | 572.28                                                           | 577.57                                                           | 579.24                                                           |
| Temperature (K)                                                                   | 296(2)                                                           | 296(2)                                                           | 296(2)                                                           | 296(2)                                                           | 296(2)                                                           |
| Crystal system                                                                    | Orthorhombic                                                     | Orthorhombic                                                     | Orthorhombic                                                     | Orthorhombic                                                     | Orthorhombic                                                     |
| Space group                                                                       | <i>Pccn</i>                                                      | <i>Pccn</i>                                                      | <i>Pccn</i>                                                      | <i>Pccn</i>                                                      | <i>Pccn</i>                                                      |
| <i>a</i> (Å)                                                                      | 10.964(2)                                                        | 10.7439(4)                                                       | 10.7995(4)                                                       | 10.6935(11)                                                      | 10.7616(3)                                                       |
| <i>b</i> (Å)                                                                      | 18.593(3)                                                        | 18.6500(6)                                                       | 18.5967(6)                                                       | 18.5976(19)                                                      | 18.5730(5)                                                       |
| <i>c</i> (Å)                                                                      | 9.6771(18)                                                       | 9.6663(3)                                                        | 9.6571(4)                                                        | 9.6661(10)                                                       | 9.6815(2)                                                        |
| <i>V</i> (Å <sup>3</sup> )                                                        | 1972.6(6)                                                        | 1936.87(11)                                                      | 1939.48(12)                                                      | 1922.3(3)                                                        | 1935.09(8)                                                       |
| <i>Z</i>                                                                          | 4                                                                | 4                                                                | 4                                                                | 4                                                                | 4                                                                |
| $\rho_{\text{calcd}}$ (g cm <sup>-3</sup> )                                       | 1.901                                                            | 1.957                                                            | 1.960                                                            | 1.996                                                            | 1.988                                                            |
| $\mu$ (mm <sup>-1</sup> )                                                         | 2.694                                                            | 3.094                                                            | 3.296                                                            | 3.513                                                            | 3.717                                                            |
| <i>F</i> (000)                                                                    | 1108.0                                                           | 1116.0                                                           | 1120.0                                                           | 1124.0                                                           | 1128.0                                                           |
| $\lambda$ (Å)                                                                     | 0.71073                                                          | 0.71073                                                          | 0.71073                                                          | 0.71073                                                          | 0.71073                                                          |
| Reflections collected                                                             | 8382                                                             | 48752                                                            | 36144                                                            | 10381                                                            | 44255                                                            |
| Independent reflections                                                           | 1806                                                             | 2783                                                             | 2618                                                             | 2206                                                             | 2414                                                             |
| <i>R</i> <sub>int</sub>                                                           | 0.1571                                                           | 0.0612                                                           | 0.0884                                                           | 0.0628                                                           | 0.0555                                                           |
| Data/restraints/parameters                                                        | 1806/49/159                                                      | 2783/49/159                                                      | 2618/49/159                                                      | 2206/49/159                                                      | 2414/49/159                                                      |
| GOF on <i>F</i> <sup>2</sup> , <i>S</i>                                           | 1.022                                                            | 1.121                                                            | 1.120                                                            | 1.064                                                            | 1.065                                                            |
| Final <i>R</i> <sub>1</sub> , <i>wR</i> <sub>2</sub> [ <i>I</i> ≥ 2σ( <i>I</i> )] | 0.0560, 0.1194                                                   | 0.0482, 0.1062                                                   | 0.0555, 0.1117                                                   | 0.0501, 0.1052                                                   | 0.0369, 0.0889                                                   |
| $\Delta\rho_{\text{max}}$ , $\Delta\rho_{\text{min}}$ (e Å <sup>-3</sup> )        | 1.03, -1.86                                                      | 1.41, -1.26                                                      | 1.35, -1.75                                                      | 1.19, -1.48                                                      | 1.12, -1.10                                                      |

**Table S1 (Continued)**

| Identification code                                                               | <b>Dy@NO<sub>3</sub></b>                                         | <b>Er@NO<sub>3</sub></b>                                         | <b>Tm@NO<sub>3</sub></b>                                         | <b>Yb@NO<sub>3</sub></b>                                         | <b>Lu@NO<sub>3</sub></b>                                         |
|-----------------------------------------------------------------------------------|------------------------------------------------------------------|------------------------------------------------------------------|------------------------------------------------------------------|------------------------------------------------------------------|------------------------------------------------------------------|
| CCDC no.                                                                          | 2504415                                                          | 2504416                                                          | 2504417                                                          | 2504418                                                          | 2504419                                                          |
| Formula                                                                           | C <sub>16</sub> H <sub>14</sub> N <sub>5</sub> O <sub>9</sub> Dy | C <sub>16</sub> H <sub>14</sub> N <sub>5</sub> O <sub>9</sub> Er | C <sub>16</sub> H <sub>14</sub> N <sub>5</sub> O <sub>9</sub> Tm | C <sub>16</sub> H <sub>14</sub> N <sub>5</sub> O <sub>9</sub> Yb | C <sub>16</sub> H <sub>14</sub> N <sub>5</sub> O <sub>9</sub> Lu |
| Formula weight                                                                    | 582.82                                                           | 587.58                                                           | 589.25                                                           | 593.36                                                           | 595.29                                                           |
| Temperature (K)                                                                   | 296(2)                                                           | 296(2)                                                           | 296(2)                                                           | 296(2)                                                           | 296(2)                                                           |
| Crystal system                                                                    | Orthorhombic                                                     | Orthorhombic                                                     | Orthorhombic                                                     | Orthorhombic                                                     | Orthorhombic                                                     |
| Space group                                                                       | <i>Pccn</i>                                                      | <i>Pccn</i>                                                      | <i>Pccn</i>                                                      | <i>Pccn</i>                                                      | <i>Pccn</i>                                                      |
| <i>a</i> (Å)                                                                      | 10.7485(7)                                                       | 10.7291(10)                                                      | 10.5281(6)                                                       | 10.5822(5)                                                       | 10.4729(3)                                                       |
| <i>b</i> (Å)                                                                      | 18.5423(12)                                                      | 18.4792(16)                                                      | 18.5264(10)                                                      | 18.4772(8)                                                       | 18.4880(5)                                                       |
| <i>c</i> (Å)                                                                      | 9.6571(6)                                                        | 9.6486(9)                                                        | 9.6725(5)                                                        | 9.6572(5)                                                        | 9.6615(3)                                                        |
| <i>V</i> (Å <sup>3</sup> )                                                        | 1924.7(2)                                                        | 1913.0(3)                                                        | 1886.60(18)                                                      | 1888.27(16)                                                      | 1870.69(9)                                                       |
| <i>Z</i>                                                                          | 4                                                                | 4                                                                | 4                                                                | 4                                                                | 4                                                                |
| $\rho_{\text{calcd}}$ (g cm <sup>-3</sup> )                                       | 2.011                                                            | 2.040                                                            | 2.075                                                            | 2.087                                                            | 2.114                                                            |
| $\mu$ (mm <sup>-1</sup> )                                                         | 3.945                                                            | 4.450                                                            | 4.767                                                            | 5.017                                                            | 5.342                                                            |
| <i>F</i> (000)                                                                    | 1132.0                                                           | 1140.0                                                           | 1144.0                                                           | 1148.0                                                           | 1152.0                                                           |
| $\lambda$ (Å)                                                                     | 0.71073                                                          | 0.71073                                                          | 0.71073                                                          | 0.71073                                                          | 0.71073                                                          |
| Reflections collected                                                             | 11657                                                            | 10402                                                            | 38129                                                            | 40145                                                            | 47919                                                            |
| Independent reflections                                                           | 2390                                                             | 1954                                                             | 2557                                                             | 2351                                                             | 3343                                                             |
| <i>R</i> <sub>int</sub>                                                           | 0.0694                                                           | 0.0809                                                           | 0.1293                                                           | 0.0714                                                           | 0.0538                                                           |
| Data/restraints/parameters                                                        | 2390/49/159                                                      | 1954/49/159                                                      | 2557/49/159                                                      | 2351/49/159                                                      | 3343/49/159                                                      |
| GOF on <i>F</i> <sup>2</sup> , <i>S</i>                                           | 1.055                                                            | 1.047                                                            | 1.059                                                            | 1.179                                                            | 1.075                                                            |
| Final <i>R</i> <sub>1</sub> , <i>wR</i> <sub>2</sub> [ <i>I</i> ≥ 2σ( <i>I</i> )] | 0.0381, 0.0840                                                   | 0.0409, 0.1027                                                   | 0.0463, 0.0979                                                   | 0.0449, 0.0907                                                   | 0.0522, 0.1098                                                   |
| $\Delta\rho_{\text{max}}$ , $\Delta\rho_{\text{min}}$ (e Å <sup>-3</sup> )        | 0.99, -1.11                                                      | 1.11, -1.71                                                      | 1.23, -1.03                                                      | 1.73, -2.74                                                      | 1.79, -2.25                                                      |

**Table S1** (Continued)

| Identification code                                                               | <b>Tb@Cl</b>                                                       | <b>Tb@Br</b>                                                       | <b>Tb@I</b>                                                       | <b>TDH</b>                                                   |
|-----------------------------------------------------------------------------------|--------------------------------------------------------------------|--------------------------------------------------------------------|-------------------------------------------------------------------|--------------------------------------------------------------|
| CCDC no.                                                                          | 2504420                                                            | 2504421                                                            | 2504422                                                           | 2540949                                                      |
| Formula                                                                           | C <sub>16</sub> H <sub>18</sub> ClN <sub>4</sub> O <sub>8</sub> Tb | C <sub>16</sub> H <sub>18</sub> BrN <sub>4</sub> O <sub>8</sub> Tb | C <sub>16</sub> H <sub>14</sub> IN <sub>4</sub> O <sub>6</sub> Tb | C <sub>8</sub> H <sub>10</sub> N <sub>4</sub> O <sub>2</sub> |
| Formula weight                                                                    | 588.71                                                             | 633.17                                                             | 644.13                                                            | 194.20                                                       |
| Temperature (K)                                                                   | 296(2)                                                             | 296(2)                                                             | 296(2)                                                            | 296(2)                                                       |
| Crystal system                                                                    | Orthorhombic                                                       | Orthorhombic                                                       | Orthorhombic                                                      | Monoclinic                                                   |
| Space group                                                                       | <i>Pccn</i>                                                        | <i>Pccn</i>                                                        | <i>Pccn</i>                                                       | <i>P2<sub>1</sub>/n</i>                                      |
| <i>a</i> (Å)                                                                      | 11.3067(6)                                                         | 11.5900(3)                                                         | 11.0634(8)                                                        | 10.1609(5)                                                   |
| <i>b</i> (Å)                                                                      | 18.2380(9)                                                         | 18.1145(5)                                                         | 18.3996(13)                                                       | 3.8194(2)                                                    |
| <i>c</i> (Å)                                                                      | 9.6785(5)                                                          | 9.7232(3)                                                          | 9.7113(7)                                                         | 12.1924(7)                                                   |
|                                                                                   | 90                                                                 | 90                                                                 | 90                                                                | 90                                                           |
|                                                                                   | 90                                                                 | 90                                                                 | 90                                                                | 113.042(2)                                                   |
|                                                                                   | 90                                                                 | 90                                                                 | 90                                                                | 90                                                           |
| <i>V</i> (Å <sup>3</sup> )                                                        | 1995.82(18)                                                        | 2041.36(10)                                                        | 1976.9(2)                                                         | 435.42(4)                                                    |
| <i>Z</i>                                                                          | 4                                                                  | 4                                                                  | 4                                                                 | 2                                                            |
| $\rho_{\text{calcd}}$ (g cm <sup>-3</sup> )                                       | 1.959                                                              | 2.060                                                              | 2.164                                                             | 1.481                                                        |
| $\mu$ (mm <sup>-1</sup> )                                                         | 3.730                                                              | 5.474                                                              | 5.179                                                             | 0.111                                                        |
| <i>F</i> (000)                                                                    | 1152.0                                                             | 1224.0                                                             | 1216.0                                                            | 204                                                          |
| $\lambda$ (Å)                                                                     | 0.71073                                                            | 0.71073                                                            | 0.71073                                                           | 0.71073                                                      |
| Reflections collected                                                             | 45148                                                              | 52025                                                              | 45101                                                             | 11279                                                        |
| Independent reflections                                                           | 2587                                                               | 2756                                                               | 3030                                                              | 1081                                                         |
| <i>R</i> <sub>int</sub>                                                           | 0.0772                                                             | 0.0383                                                             | 0.0661                                                            | 0.0467                                                       |
| Data/restraints/parameters                                                        | 2587/12/152                                                        | 2756/6/152                                                         | 3030/12/142                                                       | 1081/2/72                                                    |
| GOF on <i>F</i> <sup>2</sup> , <i>S</i>                                           | 1.147                                                              | 1.137                                                              | 1.059                                                             | 1.139                                                        |
| Final <i>R</i> <sub>1</sub> , <i>wR</i> <sub>2</sub> [ <i>I</i> ≥ 2σ( <i>I</i> )] | 0.0384, 0.0822                                                     | 0.0595, 0.1626                                                     | 0.0408, 0.0933                                                    | 0.0592, 0.1491                                               |
| $\Delta\rho_{\text{max}}$ , $\Delta\rho_{\text{min}}$ (e Å <sup>-3</sup> )        | 0.95, -1.29                                                        | 1.92, -3.81                                                        | 1.16, -1.40                                                       | 0.30, -0.29                                                  |

**Table S2** The selected bond lengths (Å) and bond angles (°) for REMOFs

|                                         | Nd@NO <sub>3</sub> | Sm@NO <sub>3</sub> | Eu@NO <sub>3</sub> | Gd@NO <sub>3</sub> | Tb@NO <sub>3</sub> | Dy@NO <sub>3</sub> | Er@NO <sub>3</sub> | Tm@NO <sub>3</sub> | Yb@NO <sub>3</sub> | Lu@NO <sub>3</sub> |
|-----------------------------------------|--------------------|--------------------|--------------------|--------------------|--------------------|--------------------|--------------------|--------------------|--------------------|--------------------|
| RE1–O1                                  | 2.452(7)           | 2.431(5)           | 2.420(5)           | 2.408(6)           | 2.403(4)           | 2.395(4)           | 2.368(5)           | 2.364(5)           | 2.361(5)           | 2.358(6)           |
| RE1–O2 <sup>ii</sup>                    | 2.345(7)           | 2.305(4)           | 2.306(5)           | 2.286(5)           | 2.279(4)           | 2.270(4)           | 2.251(5)           | 2.237(5)           | 2.232(4)           | 2.216(5)           |
| RE1–O3 <sup>iv</sup>                    | 2.413(8)           | 2.369(5)           | 2.356(5)           | 2.334(6)           | 2.328(4)           | 2.309(4)           | 2.279(5)           | 2.276(5)           | 2.255(5)           | 2.248(6)           |
| RE1–N1                                  | 2.667(9)           | 2.614(7)           | 2.616(7)           | 2.566(8)           | 2.584(6)           | 2.569(6)           | 2.532(7)           | 2.510(8)           | 2.505(7)           | 2.483(8)           |
| O1–RE1–O1 <sup>i</sup>                  | 134.8(4)           | 134.7(2)           | 135.5(2)           | 134.9(3)           | 134.80(19)         | 134.83(19)         | 135.3(2)           | 134.5(3)           | 134.7(2)           | 134.2(3)           |
| O1–RE1–N1 <sup>i</sup>                  | 142.2(3)           | 141.40(18)         | 140.60(18)         | 140.6(2)           | 140.19(15)         | 139.88(15)         | 139.26(18)         | 138.7(2)           | 138.49(19)         | 138.6(2)           |
| O1–RE1–N1                               | 60.9(3)            | 61.24(18)          | 61.51(18)          | 61.9(2)            | 62.36(15)          | 62.65(15)          | 62.99(19)          | 63.8(2)            | 63.87(19)          | 64.1(2)            |
| O2 <sup>ii</sup> –RE1–O1                | 80.4(3)            | 80.28(17)          | 79.78(18)          | 80.1(2)            | 79.92(14)          | 79.56(14)          | 79.10(17)          | 79.3(2)            | 78.81(18)          | 79.2(2)            |
| O2 <sup>iii</sup> –RE1–O1               | 135.8(3)           | 135.35(18)         | 135.15(19)         | 135.2(2)           | 135.29(15)         | 135.63(15)         | 135.53(19)         | 136.1(2)           | 136.4(2)           | 136.4(2)           |
| O2 <sup>ii</sup> –RE1–O2 <sup>iii</sup> | 88.4(4)            | 90.3(3)            | 90.8(3)            | 90.7(3)            | 91.6(2)            | 92.0(2)            | 92.8(3)            | 92.5(3)            | 92.9(3)            | 92.9(3)            |
| O2 <sup>ii</sup> –RE1–O3 <sup>iv</sup>  | 145.8(3)           | 148.0(2)           | 148.8(2)           | 148.6(2)           | 149.49(16)         | 149.29(16)         | 149.8(2)           | 86.1(2)            | 86.5(2)            | 86.4(2)            |
| O2 <sup>ii</sup> –RE1–O3 <sup>v</sup>   | 83.1(3)            | 83.2(2)            | 83.9(2)            | 84.2(2)            | 84.48(17)          | 84.94(16)          | 85.1(2)            | 149.3(2)           | 149.7(2)           | 149.6(2)           |
| O2 <sup>ii</sup> –RE1–N1                | 72.1(3)            | 73.9(2)            | 74.5(2)            | 74.5(2)            | 74.95(17)          | 74.89(17)          | 75.4(2)            | 75.4(2)            | 75.3(2)            | 75.4(3)            |
| O2 <sup>iii</sup> –RE1–N1               | 75.0(3)            | 74.19(19)          | 73.7(2)            | 73.4(2)            | 73.01(15)          | 73.06(16)          | 72.62(19)          | 72.4(2)            | 72.6(2)            | 72.3(2)            |
| O3 <sup>v</sup> –RE1–O1                 | 75.3(3)            | 74.46(18)          | 74.18(19)          | 74.4(2)            | 73.84(15)          | 73.87(16)          | 73.7(2)            | 73.7(2)            | 73.19(19)          | 73.3(2)            |
| O3 <sup>iv</sup> –RE1–O1                | 82.9(3)            | 82.50(17)          | 82.45(19)          | 81.9(2)            | 81.74(15)          | 81.45(16)          | 81.5(2)            | 80.7(2)            | 80.89(18)          | 80.5(2)            |
| O3 <sup>iv</sup> –RE1–O3 <sup>v</sup>   | 120.9(4)           | 117.6(3)           | 115.5(3)           | 115.3(3)           | 113.4(2)           | 112.5(2)           | 111.3(3)           | 110.1(3)           | 108.9(3)           | 109.0(3)           |
| O3 <sup>v</sup> –RE1–N1                 | 132.1(3)           | 132.57(18)         | 133.16(19)         | 133.6(2)           | 133.94(15)         | 134.43(16)         | 134.91(19)         | 135.9(2)           | 135.67(19)         | 136.0(2)           |
| O3 <sup>iv</sup> –RE1–N1                | 73.7(3)            | 74.19(19)          | 74.5(2)            | 74.4(2)            | 74.98(17)          | 75.00(17)          | 75.2(2)            | 75.1(2)            | 75.6(2)            | 75.5(2)            |
| N1–RE1–N1 <sup>i</sup>                  | 133.5(4)           | 134.1(3)           | 134.0(3)           | 133.7(4)           | 133.4(3)           | 133.2(3)           | 132.9(4)           | 132.6(4)           | 132.8(3)           | 132.4(4)           |

Symmetry codes: (i)  $-x + 1/2, -y + 3/2, z$ ; (ii)  $-x + 1, -y + 1, -z + 1$ ; (iii)  $x - 1/2, y + 1/2, -z + 1$ ; (iv)  $-x + 1, y + 1/2, -z + 3/2$ ; (v)  $x - 1/2, -y + 1, -z + 3/2$ .

**Table S2 (Continued)**

|                                         | <b>Tb@Cl</b> | <b>Tb@Br</b> | <b>Tb@I</b> |
|-----------------------------------------|--------------|--------------|-------------|
| RE1–O1                                  | 2.405(4)     | 2.410(5)     | 2.404(4)    |
| RE1–O2 <sup>ii</sup>                    | 2.285(4)     | 2.288(5)     | 2.279(4)    |
| RE1–O3 <sup>iv</sup>                    | 2.327(4)     | 2.325(5)     | 2.309(5)    |
| RE1–N1                                  | 2.569(5)     | 2.572(7)     | 2.570(7)    |
|                                         |              |              |             |
| O1–RE1–O1 <sup>i</sup>                  | 135.28(18)   | 136.0(2)     | 135.7(2)    |
| O1 <sup>i</sup> –RE1–N1                 | 140.22(14)   | 140.1(2)     | 139.79(17)  |
| O1–RE1–N1                               | 62.49(14)    | 62.43(19)    | 62.40(17)   |
| O2 <sup>ii</sup> –RE1–O1                | 79.68(13)    | 79.58(18)    | 79.13(17)   |
| O2 <sup>ii</sup> –RE1–O1 <sup>i</sup>   | 134.86(15)   | 134.31(18)   | 135.21(18)  |
| O2 <sup>ii</sup> –RE1–O2 <sup>iii</sup> | 92.5(2)      | 92.6(3)      | 92.6(2)     |
| O2 <sup>ii</sup> –RE1–O3 <sup>v</sup>   | 84.01(15)    | 84.4(2)      | 85.32(18)   |
| O2 <sup>iii</sup> –RE1–O3 <sup>v</sup>  | 149.63(16)   | 149.9(2)     | 149.64(19)  |
| O2 <sup>ii</sup> –RE1–N1                | 75.13(16)    | 75.5(2)      | 75.17(19)   |
| O2 <sup>iii</sup> –RE1–N1               | 72.50(15)    | 72.0(2)      | 72.90(18)   |
| O3 <sup>v</sup> –RE1–O1                 | 74.25(15)    | 74.64(18)    | 74.16(18)   |
| O3 <sup>iv</sup> –RE1–O1                | 81.63(15)    | 81.3(2)      | 81.17(17)   |
| O3 <sup>iv</sup> –RE1–O3 <sup>v</sup>   | 113.5(2)     | 112.4(3)     | 111.1(3)    |
| O3 <sup>v</sup> –RE1–N1                 | 134.39(15)   | 135.0(2)     | 134.76(18)  |
| O3 <sup>iv</sup> –RE1–N1                | 75.05(16)    | 75.2(2)      | 75.29(19)   |
| N1–RE1–N <sup>1i</sup>                  | 132.5(2)     | 132.2(3)     | 133.1(3)    |

Symmetry codes: (i)  $-x + 1/2, -y + 3/2, z$ ; (ii)  $-x + 1, -y + 1, -z + 1$ ; (iii)  $x - 1/2, y + 1/2, -z + 1$ ; (iv)  $-x + 1, y + 1/2, -z + 3/2$ ; (v)  $x - 1/2, -y + 1, -z + 3/2$ .

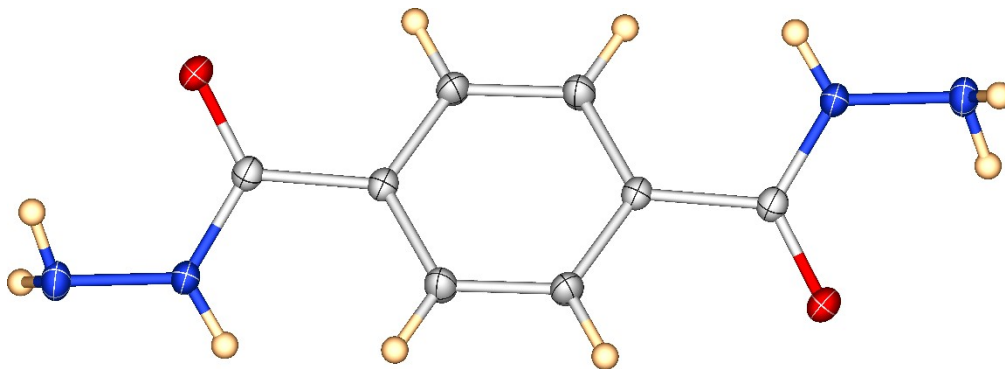**Fig. S1** Crystal structure of the TDH compound.

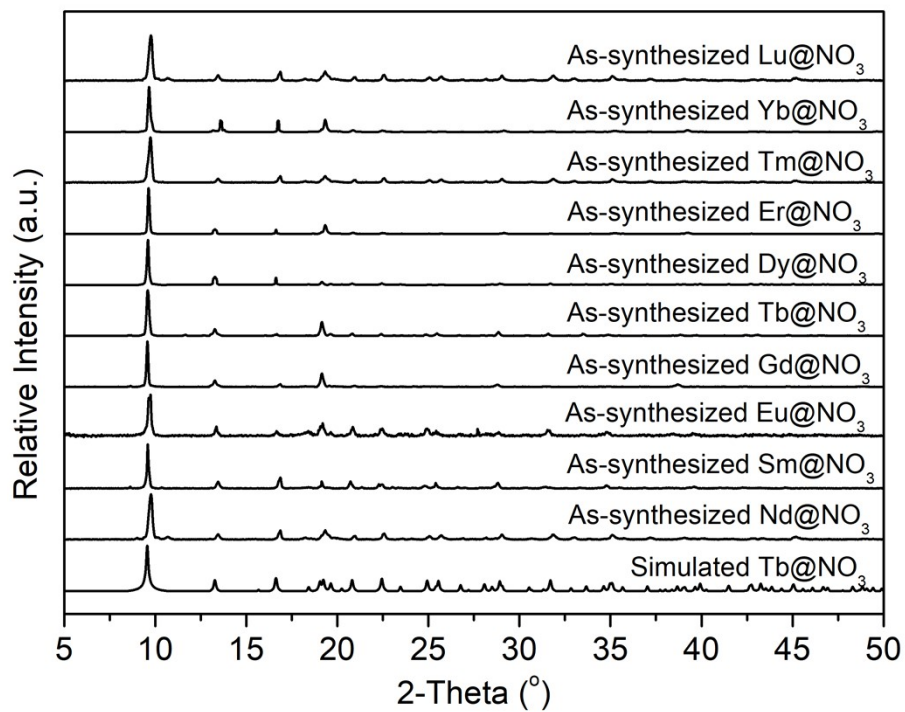

(a)

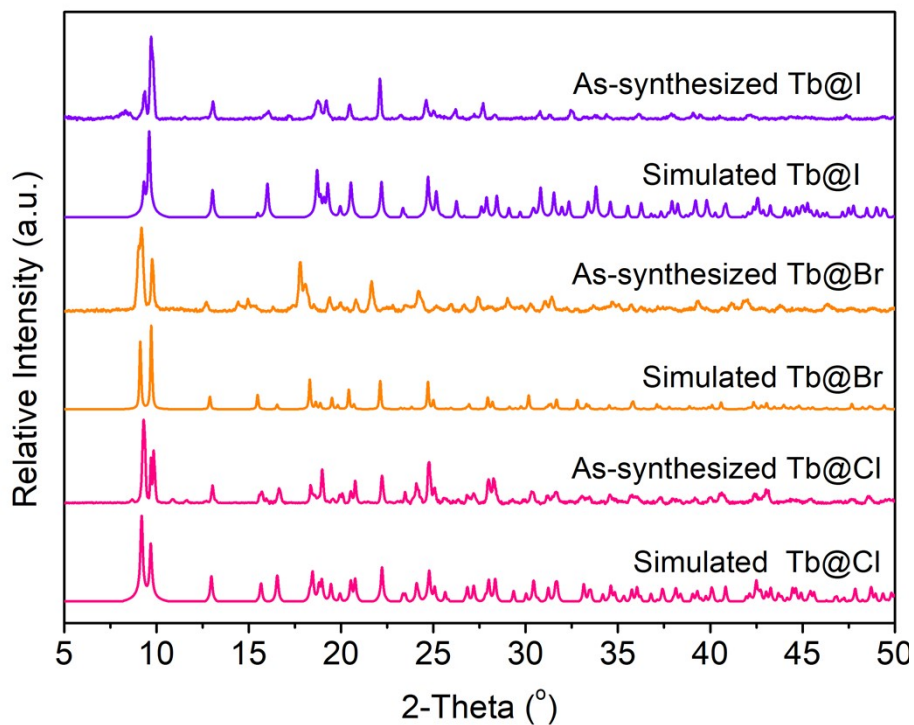

(b)

**Fig. S2** Comparison of the simulated and as-synthesized PXRD patterns for (a) **RE@NO<sub>3</sub>** and (b) **Tb@X** (X = Cl, Br, I).

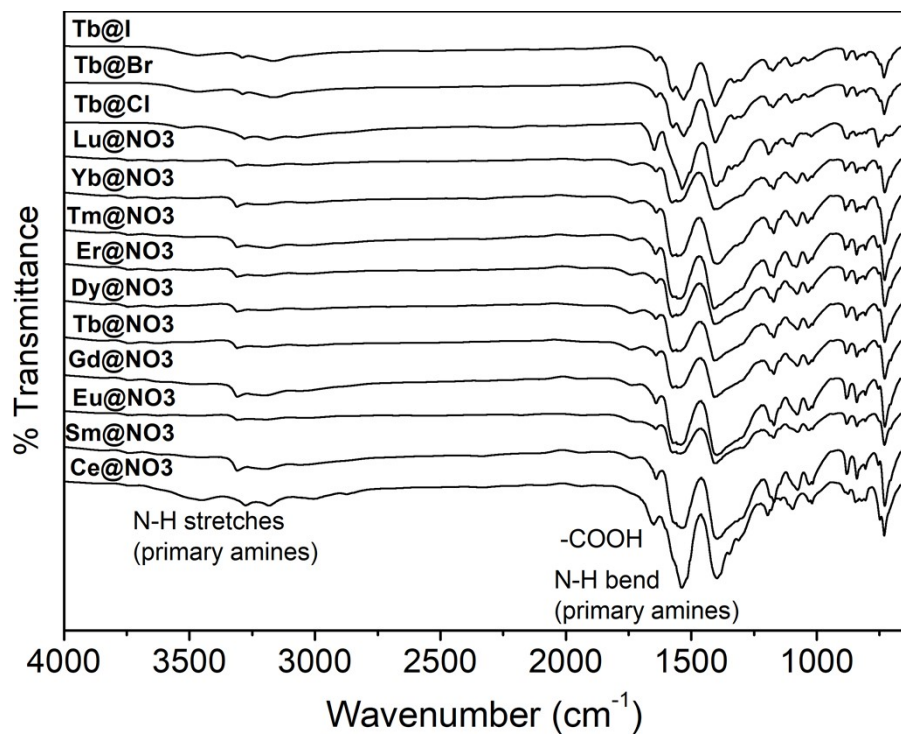

Fig. S3 IR spectra for  $\text{RE@NO}_3$  and  $\text{Tb@X}$  ( $X = \text{Cl}, \text{Br}, \text{I}$ ).

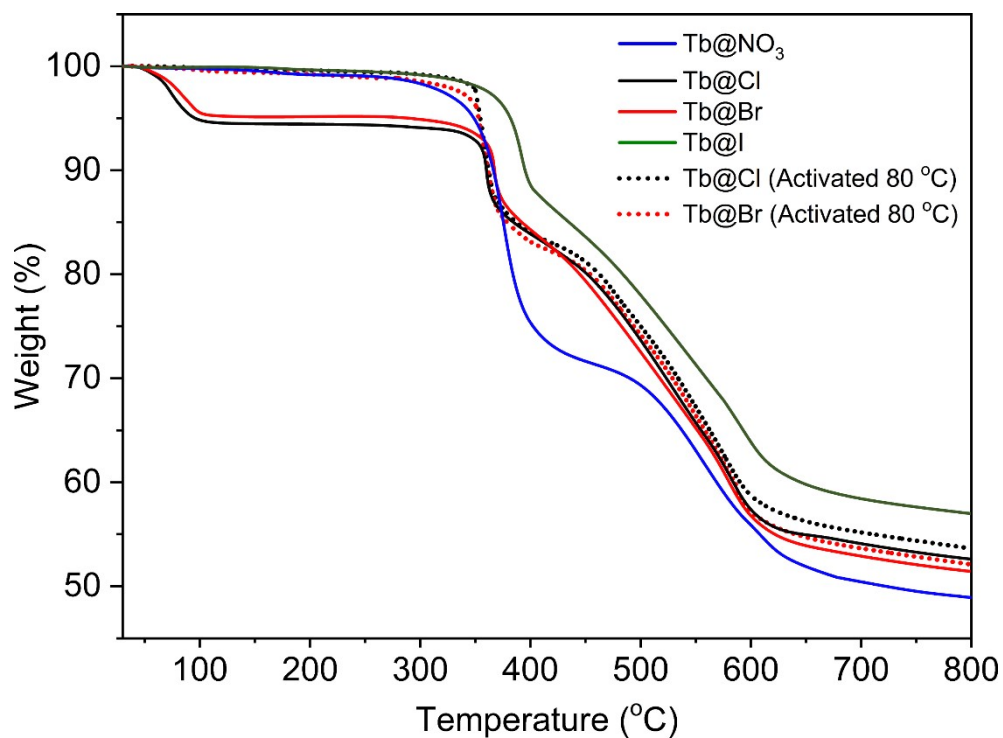

Fig. S4 TGA curves for the following Tb-based compounds:  $\text{Tb@NO}_3$ ,  $\text{Tb@Cl}$ ,  $\text{Tb@Br}$ ,  $\text{Tb@I}$ , activated  $\text{Tb@Cl}$ , and activated  $\text{Tb@Br}$ .

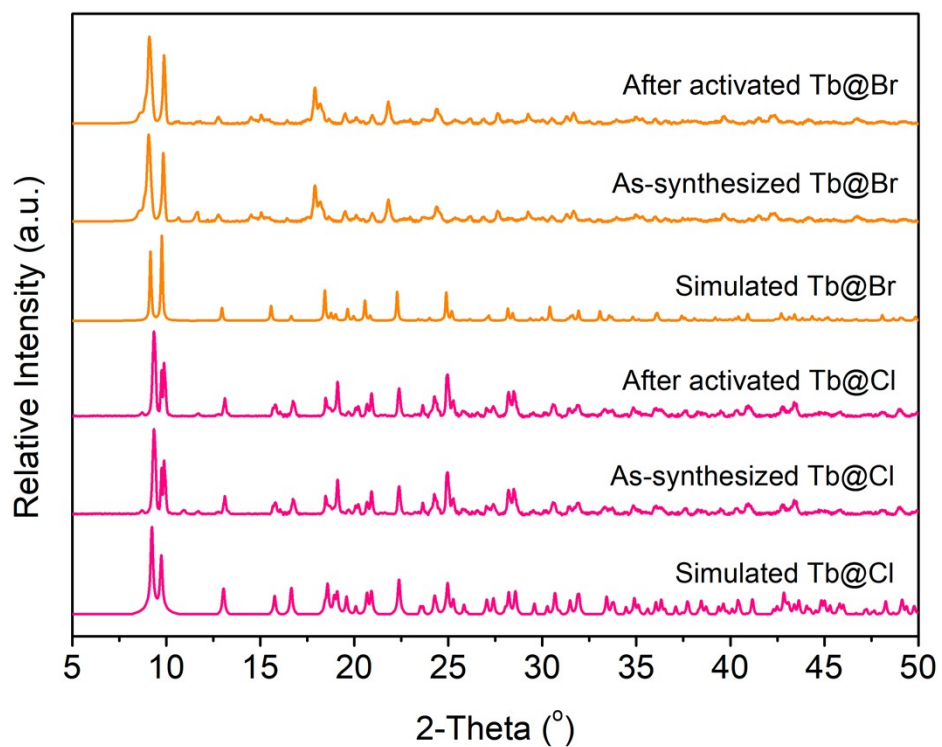

Fig. S5 The simulated PXRD patterns, as-synthesized and after thermal activation of **Tb@Cl** and **Tb@Br**

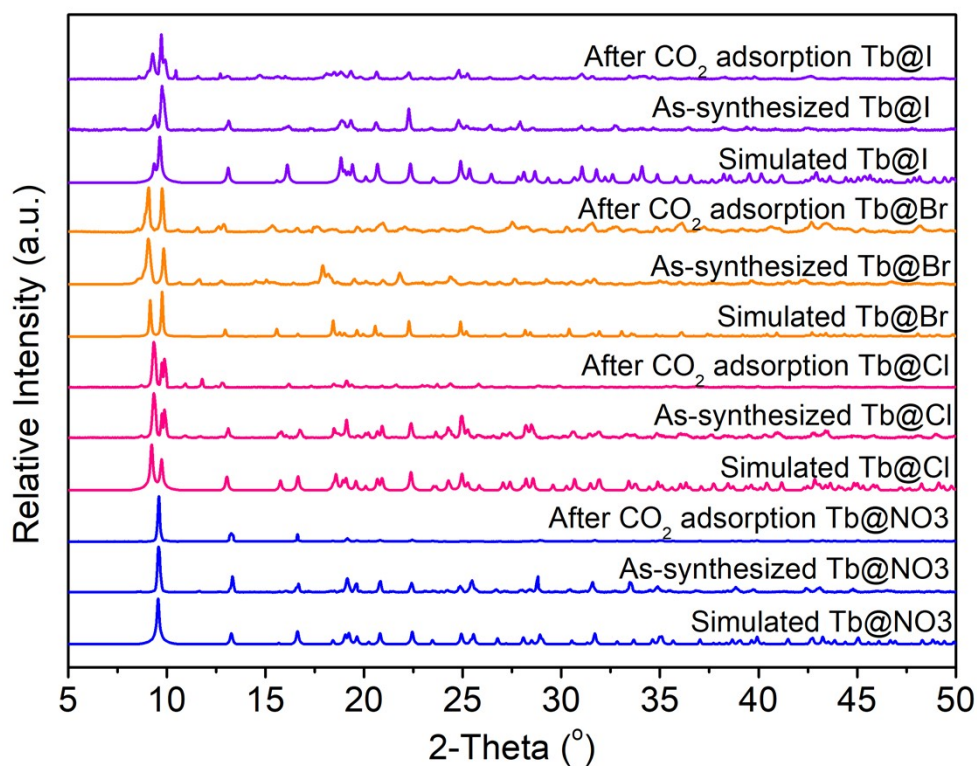

Fig. S6 PXRD patterns before and after gas sorption of **Tb@NO<sub>3</sub>**, **Tb@Cl**, **Tb@Br**, and **Tb@I**.

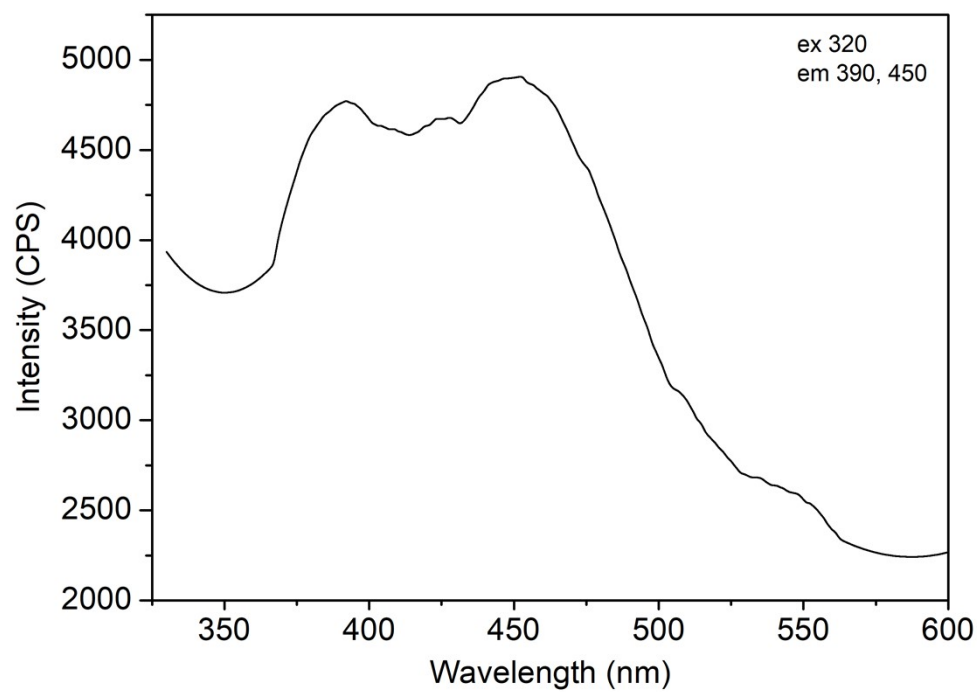

**Fig. S7** The luminescence spectrum of the free TDH ligand in solid-state ( $\lambda_{\text{excitation}} = 320$  nm).
